# Supplementary material
Source: PubMed Central journal article supplement (PMC10841494)

A)

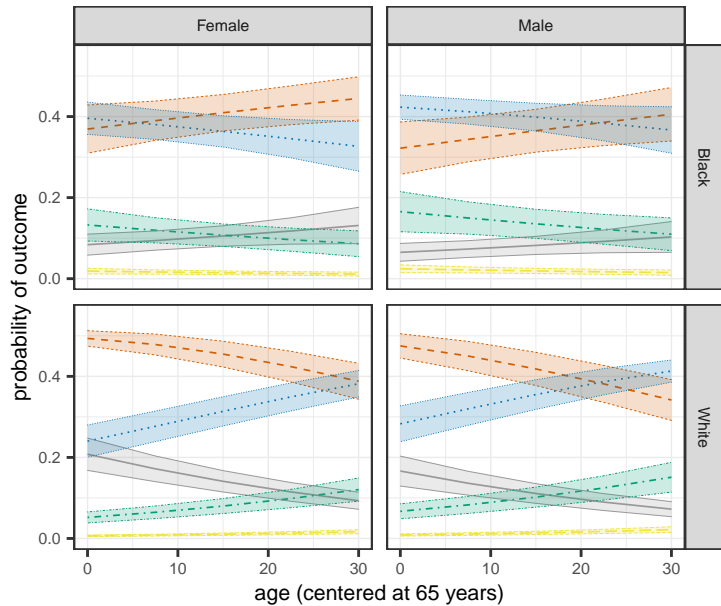

B)

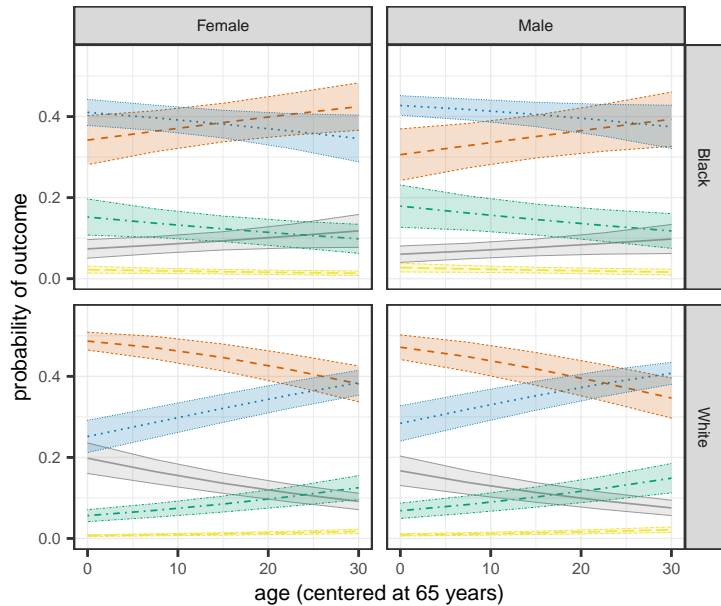

Sleep health composite  
 (# of poor characteristics)

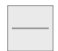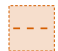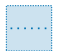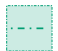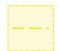

Supplement: NIHMS1936576-supplement-1.pdf [file NIHMS1936576-supplement-1.pdf]

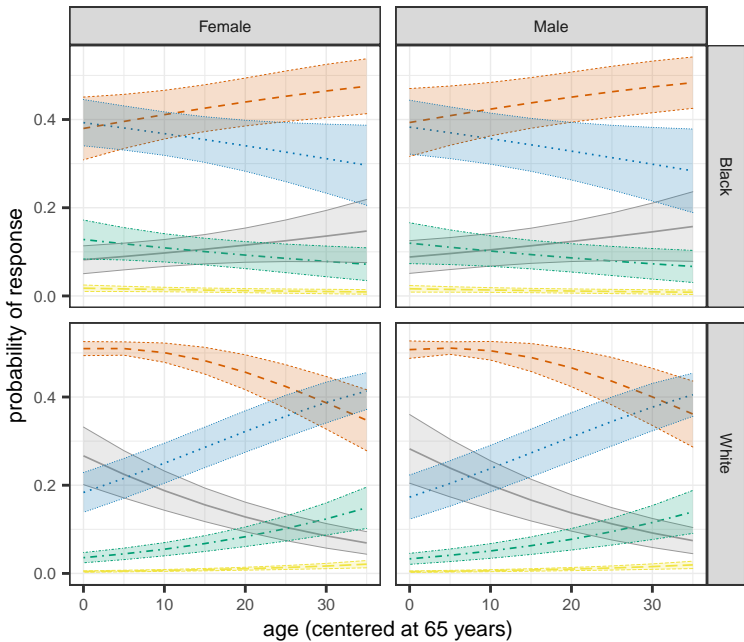

Sleep health composite  
 (# of poor characteristics)

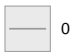

0 1 2 3 4

Supplement: NIHMS1936576-supplement-2.pdf [file NIHMS1936576-supplement-2.pdf]
